# Supplementary material for: Visualization of dynamics in coupled multi-spin systems
Source: Copernicus journal article supplement (doi:10.5194/mr-3-145-2022), 2022-08-09
Supplement: Supplementary file 1 [file mr-3-145-2022-supplement.zip]

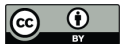

## *Supplement of*

# **Visualization of dynamics in coupled multi-spin systems**

**Jingyan Xu et al.**

*Correspondence to:* Danila A. Barskiy (dbarskiy@uni-mainz.de)

- [mr-3-145-2022-supplement-title-page.pdf](#)
- [code.zip](#)
- [video.zip](#)

The copyright of individual parts of the supplement might differ from the article licence.
